# Supplementary material for: Self-limiting stoichiometry in SnSe thin films
Source: Royal Society of Chemistry journal article supplement (doi:10.1039/d3nr00645j), 2023-01-01
Supplement: d3nr00645j1.pdf [file d3nr00645j1.pdf]

# ARTICLE

Received 00th January 20xx,  
Accepted 00th January 20xx

DOI: 10.1039/x0xx00000x

## Self-Limiting Stoichiometry in SnSe Thin Films

Jonathan Chin<sup>a</sup>, Marshall Frye<sup>a</sup>, Derrick Shao-Heng Liu<sup>b</sup>, Maria Hilse<sup>c</sup>, Ian Graham<sup>a</sup>, Jeffrey Shallenberger<sup>c</sup>, Ke Wang<sup>c</sup>, Roman Engel-Herbert<sup>d</sup>, Mengyi Wang<sup>b</sup>, Yun Kyung Shin<sup>c</sup>, Nadire Nayir<sup>c,e</sup>, Adri C.T. van Duin<sup>b</sup>, Lauren M. Garten<sup>a\*</sup>

### Supporting Information

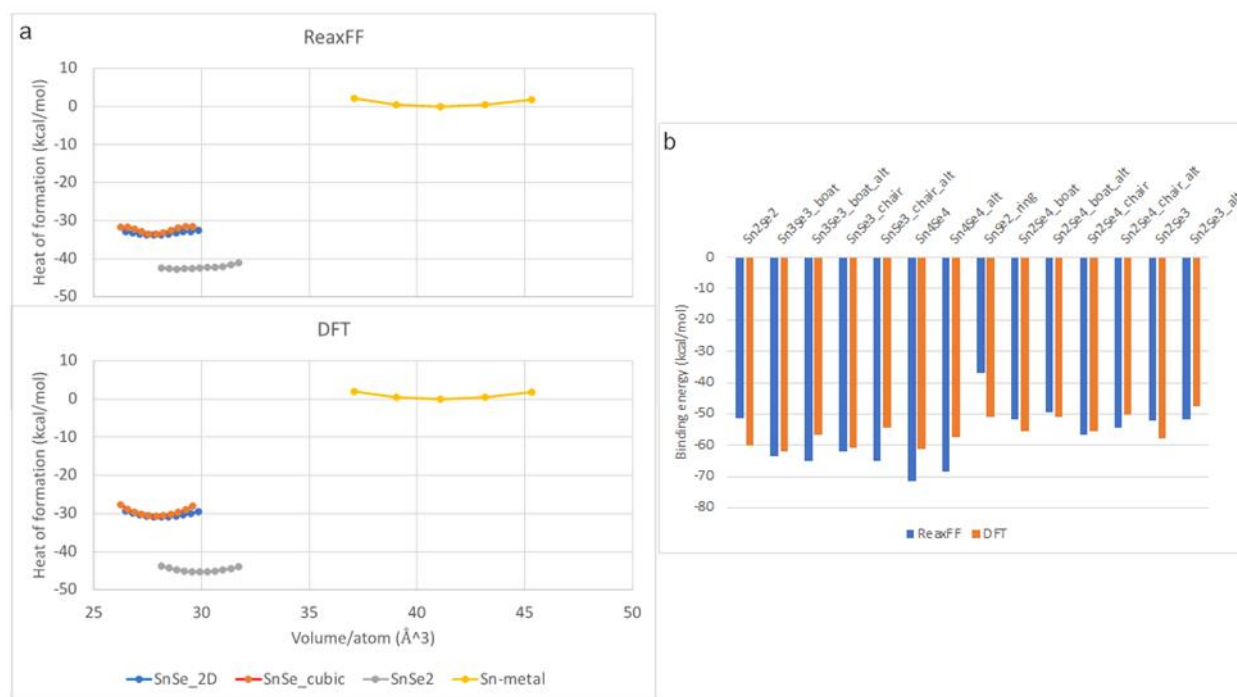

**Fig. S1** Free energy plot as a function of composition showing (a) Heats of formation and Equations of state for  $\text{SnSe}_n$  crystals where  $n=0, 1, 2$ ; and (b) Binding energies of  $\text{Sn}_x\text{Se}_y$  clusters.

<sup>a</sup> The School of Materials Science and Engineering, Georgia Institute of Technology, Atlanta, Georgia 30332-0245, USA. Email: lauren.garten@mse.gatech.edu

<sup>b</sup> Department of Materials Science and Engineering, The Pennsylvania State University, University Park, Pennsylvania 16802, USA.

<sup>c</sup> Materials Research Institute, The Pennsylvania State University, University Park, Pennsylvania 16802, USA.

<sup>d</sup> Paul-Drude Institut für Festkörperelektronik Berlin, Leibniz-Institut im Forschungsverbund Berlin eV., Berlin 10117, Germany.

<sup>e</sup> Physics Department, Karamanoglu Mehmetbey University, Karaman, 70000, Turkey.

†Electronic Supplementary Information (ESI) available: [details of any supplementary information available should be included here]. See DOI: 10.1039/x0xx00000x

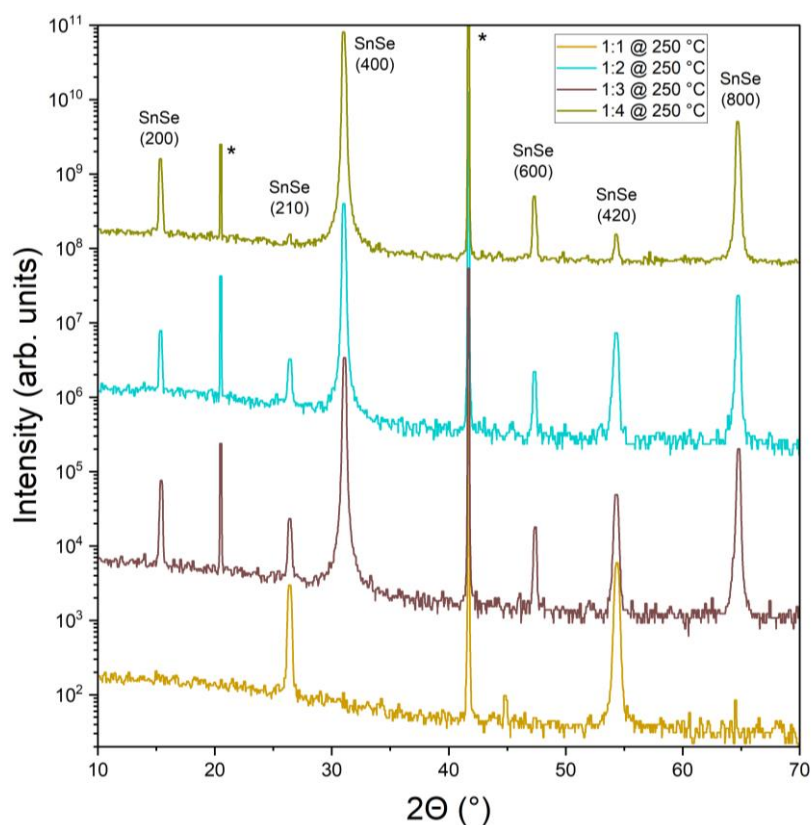

Fig. S2 XRD of SnSe grown on  $\text{Al}_2\text{O}_3$  for 83 min at 250 °C with a range of flux ratio from 1:1-1:4.

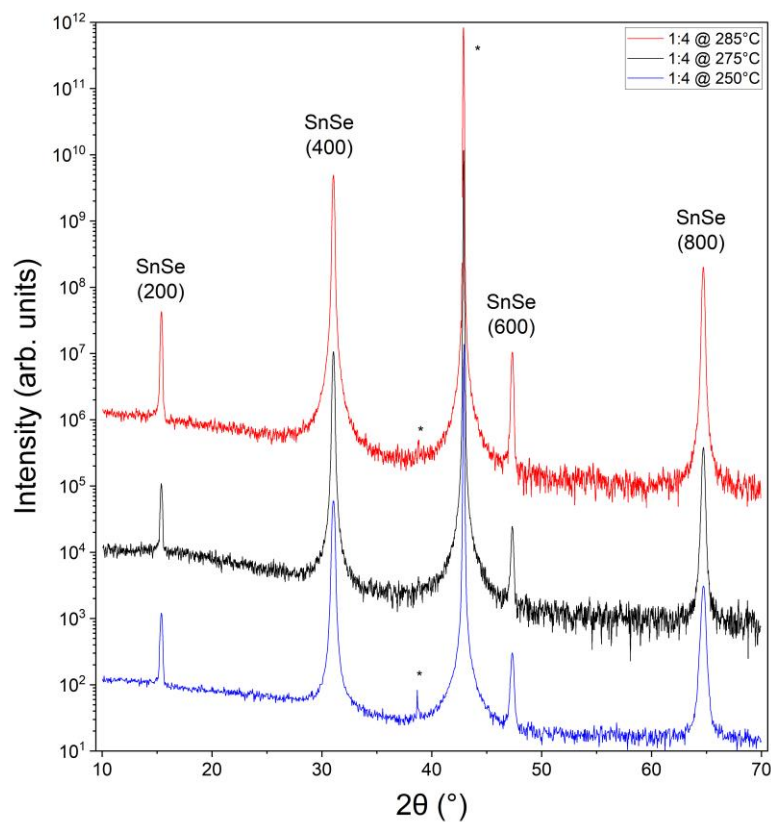

Fig. S3 XRD of SnSe grown on  $\text{MgO}$  for 83 min at temperatures ranging from 250-285 °C

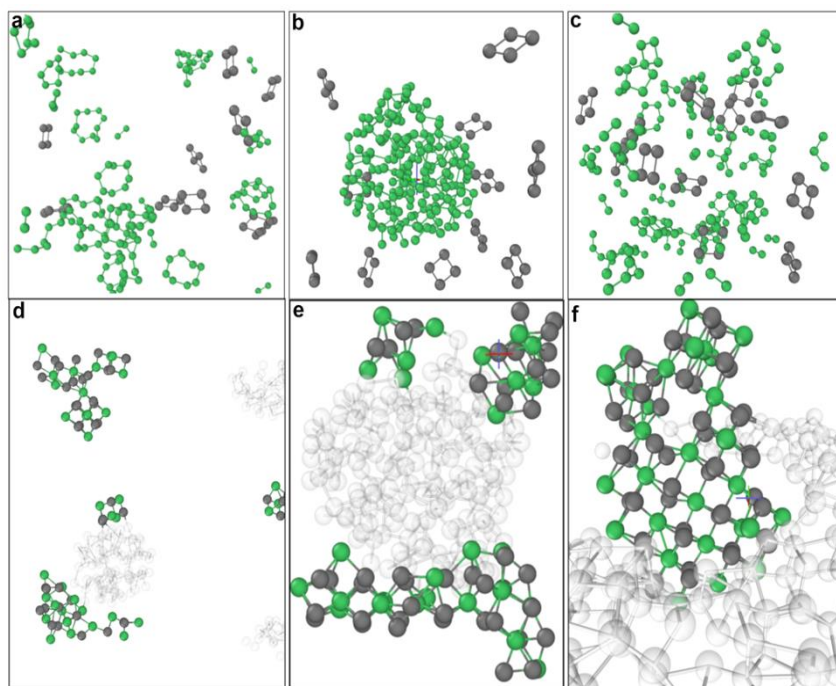

**Fig. S4** The crystal growth of SnSe at 500K depending on different cluster sizes of Se precursors. (a, b, c) Initial and (d, e, f) final configurations of systems of interest.

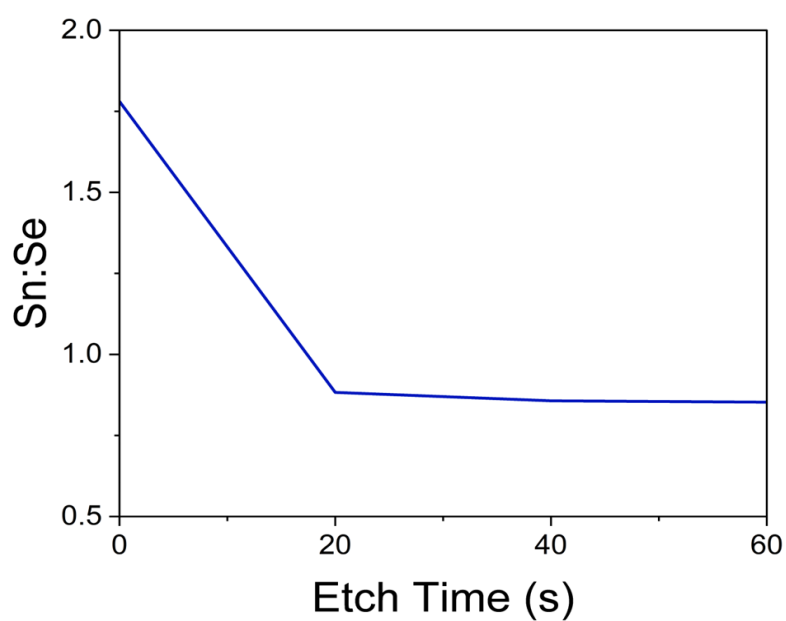

**Fig. S5** ToF-SIMS depth profile showing the change in Sn:Se counts ratio as a function of etch time.

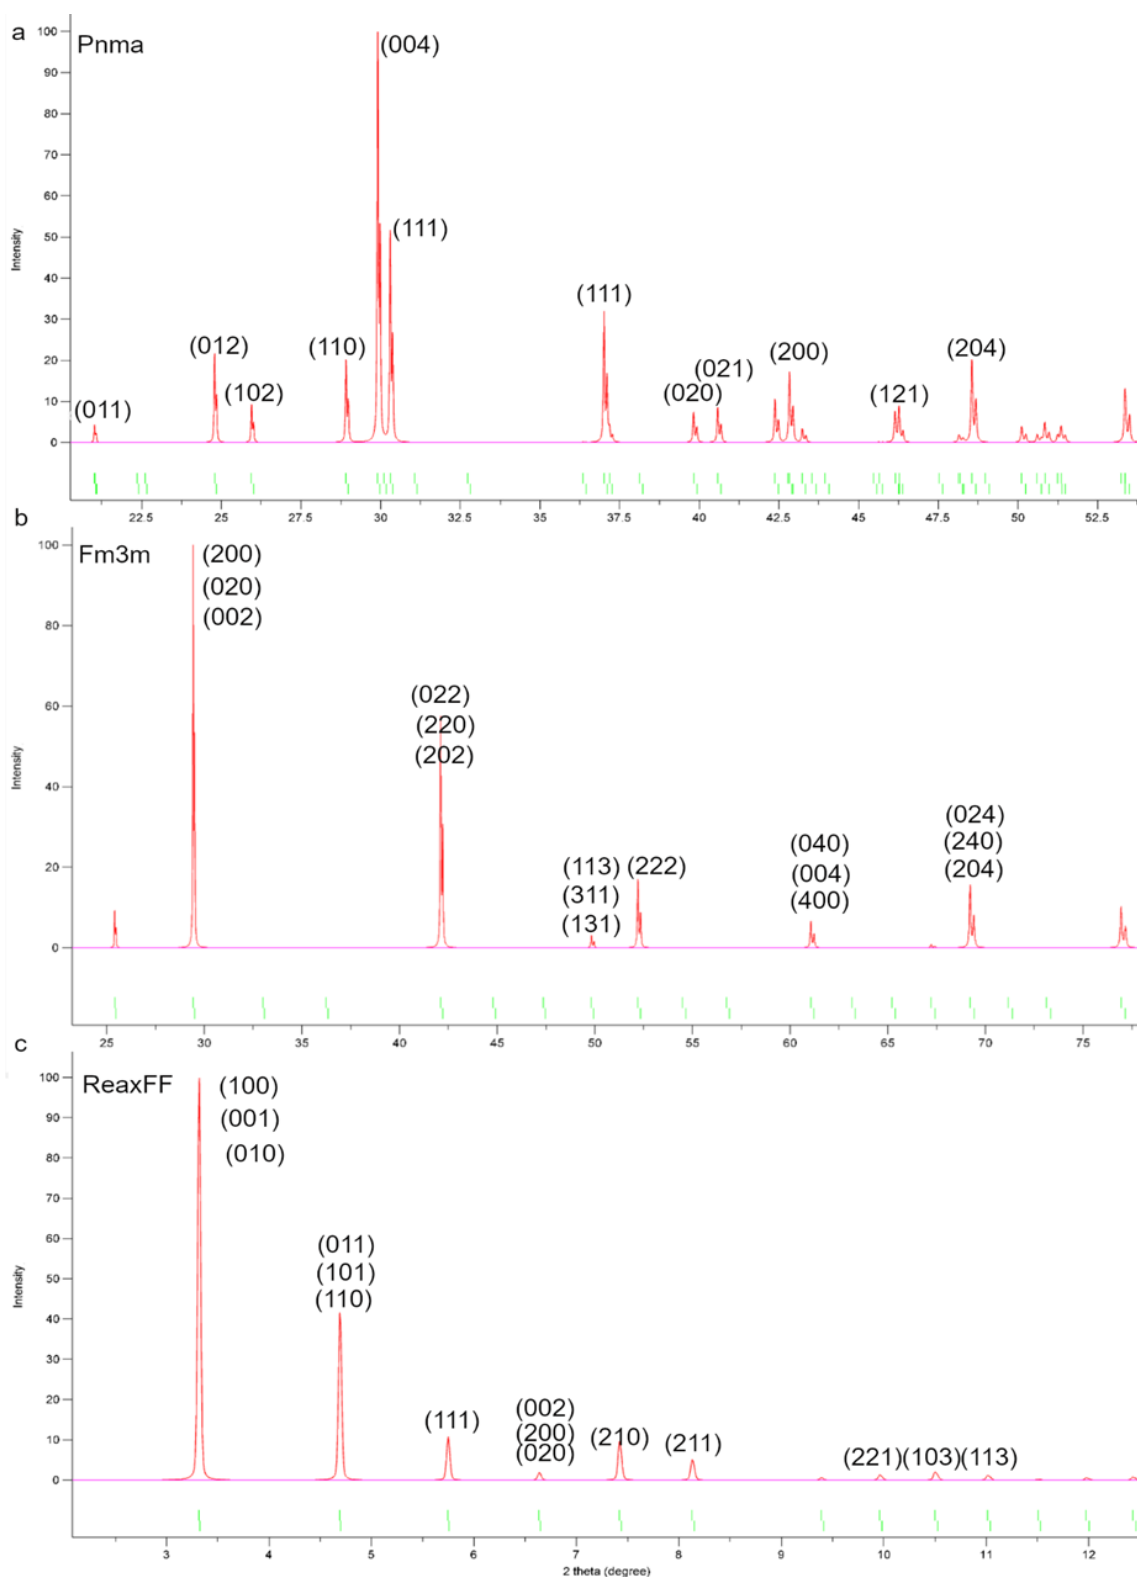

Fig. S6 Computed powder X-ray diffraction patterns of (a) *Pnma*, (b) *Fm3m* and (c) the ReaxFF-generated structure in Fig. S4-f using VESTA<sup>55</sup>.

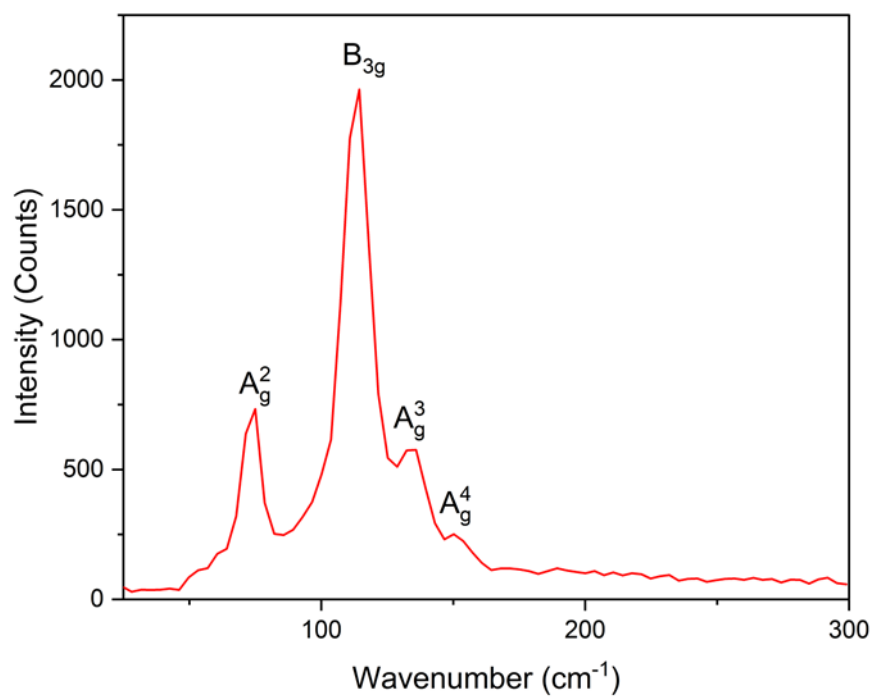

**Fig. S7** Raman spectra of SnSe bulk single crystal sourced from 2D Semiconductors as a control. The  $\text{SnSe}_2$   $A_g$  mode at 185  $\text{cm}^{-1}$  is not present. The Renishaw Raman spectrometer used to capture this spectrum has a cutoff filter below 50  $\text{cm}^{-1}$  that obscures the  $A_{1g}$  mode.
